# Supplementary material
Source: MDPI journal article supplement (https://www.mdpi.com/2673-9976/6/1/23)
Supplement: s1 [file s1]

María Celeiro <sup>a\*</sup>, Aly Castillo <sup>a</sup>, Alicja Rosalowska <sup>a</sup>, Carmen Garcia-Jares <sup>a</sup>, Marta Lores <sup>b</sup>

<sup>a</sup> CRETUS, Department of Analytical Chemistry, Nutrition and Food Science, Universidade de Santiago de Compostela, E-15782, Santiago de Compostela, Spain.

<sup>b</sup> LIDSA, Department of Analytical Chemistry, Nutrition and Food Science, Universidade de Santiago de Compostela, E-15782, Santiago de Compostela, Spain.

\*maria.celeiro.montero@usc.es

## INTRODUCTION

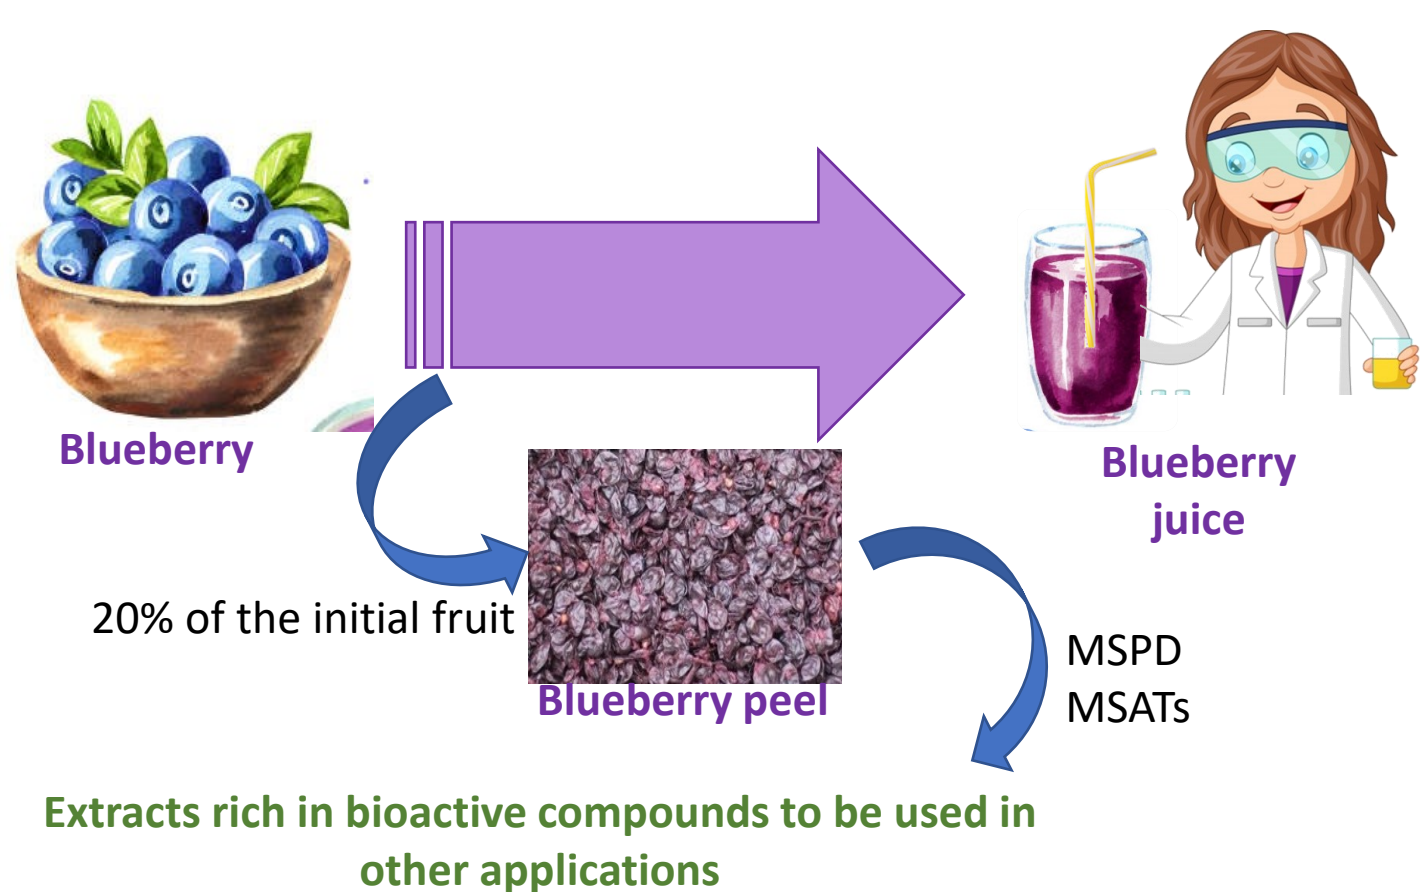

The main solid by-product of the blueberry juice processing is peel, representing up to 20% of the initial fruit weight. Its excessive accumulation causes a seasonal management and environmental problem. The main objective of this work is to perform a deep characterization of the blueberry peel residues, and their derived extracts. To obtain extracts, environmentally friendly procedures, matrix solid-phase dispersion (MSPD) and Medium-scale Ambient Temperature Systems (MSATs), have been employed. Physical, mechanical, and chemical characteristics of the raw material (blueberry), as well as the total polyphenolic content (TPC) and antioxidant capacity of the corresponding by-products and derived extracts were assessed. Liquid chromatography-tandem mass spectrometry (LC-MS/MS) was employed to quantify individual phenolic compounds.

## OBTENTION OF READY-TO-USE EXTRACTS

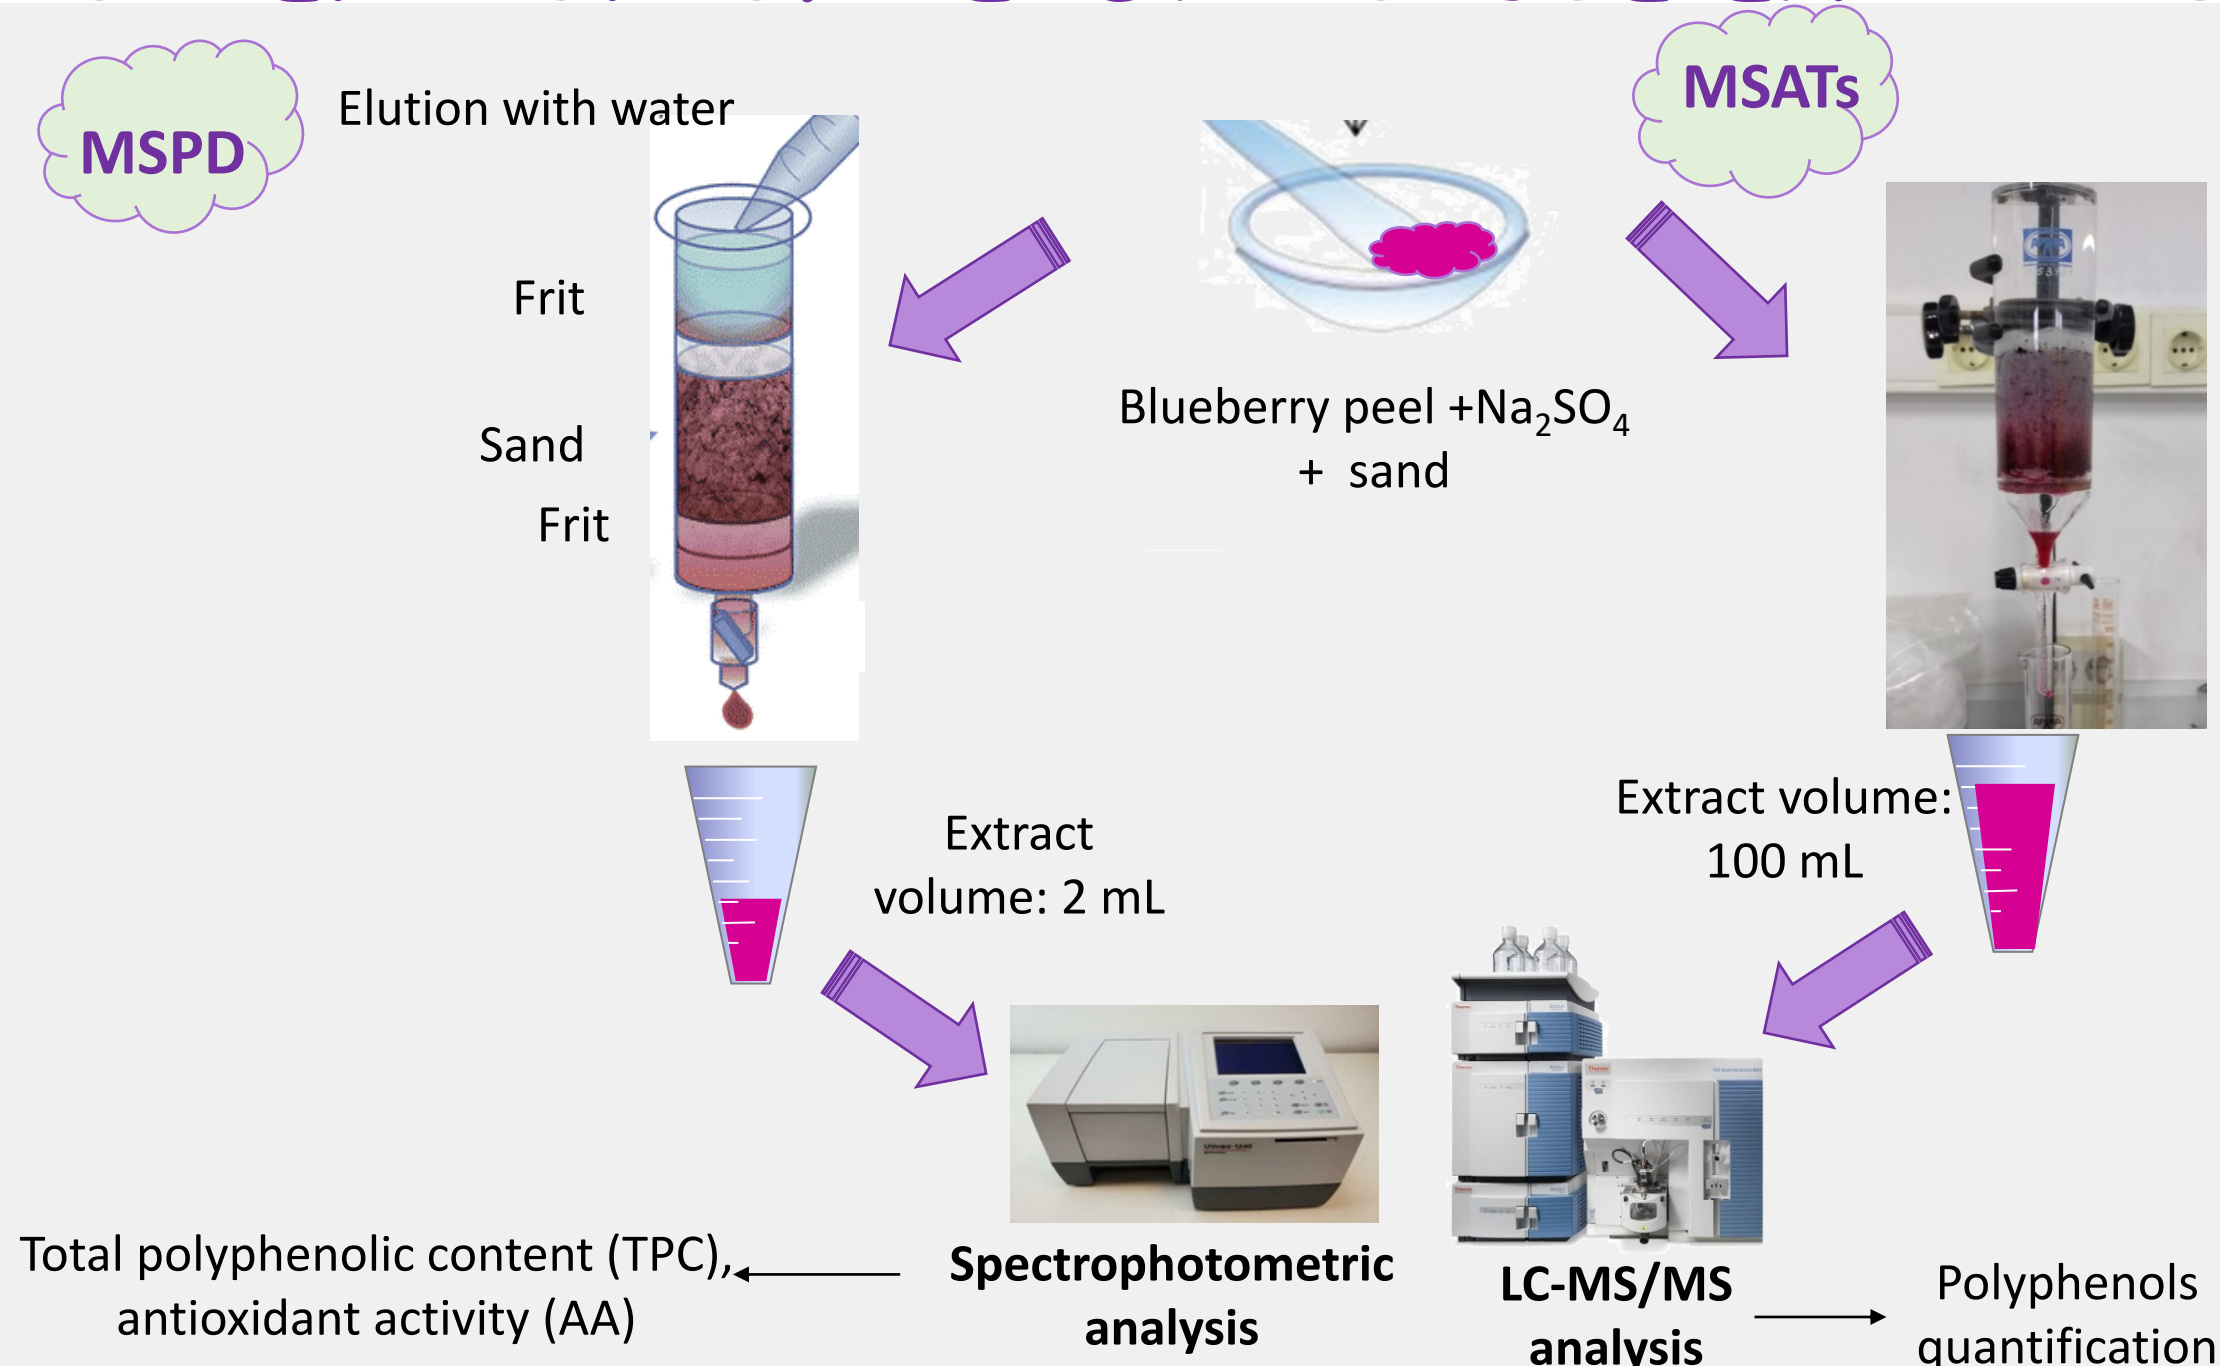

## Advantages of using MSPD and MSATs to obtain blueberry peel extracts

- ✓ Environmentally friendly methodology, fulfilling with the GAC principles (water as extractant).
- ✓ No further steps are needed before analysis, since simultaneous extraction and clean-up is performed in a single step.
- ✓ Low-cost material and low reagents consumption.
- ✓ Zero energy consumption
- ✓ Ready-to-use extracts in other applications

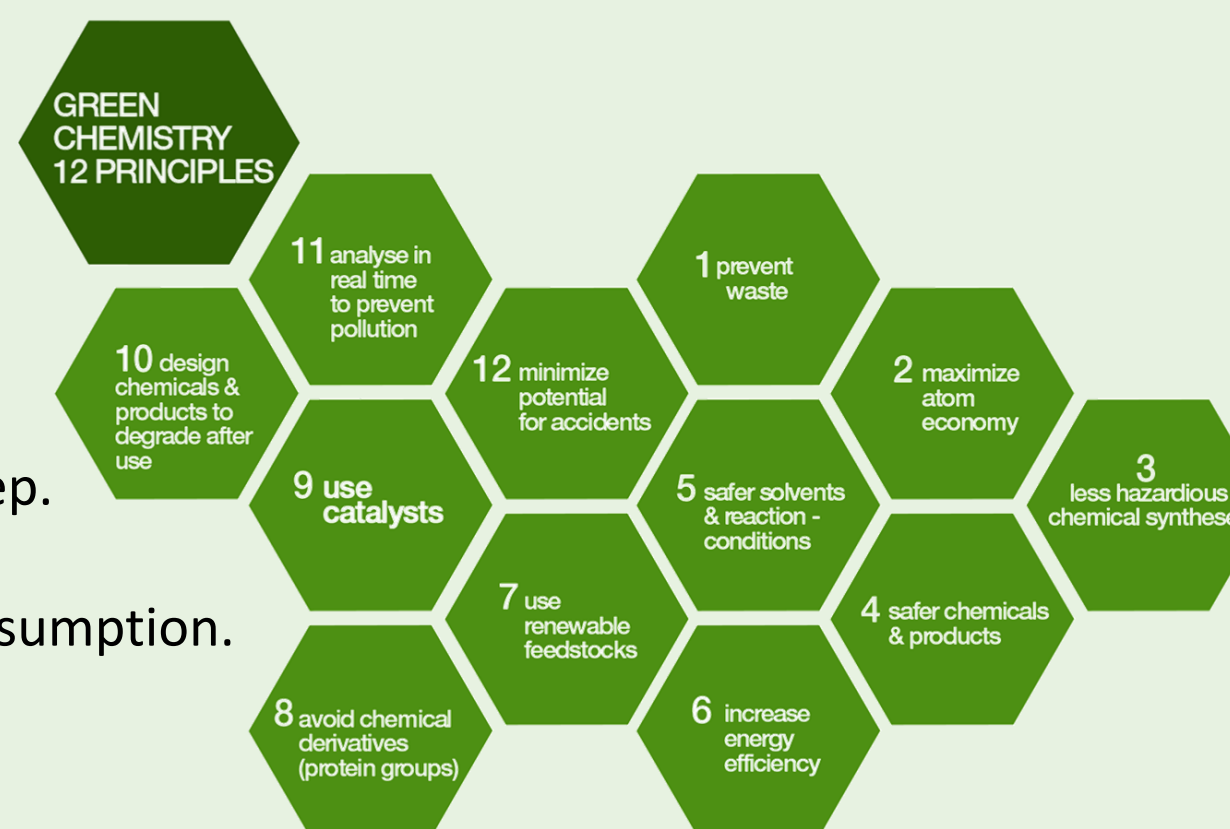

## PHYSISCOCHEMICAL PARAMETERS

### Total polyphenolic content (TPC)

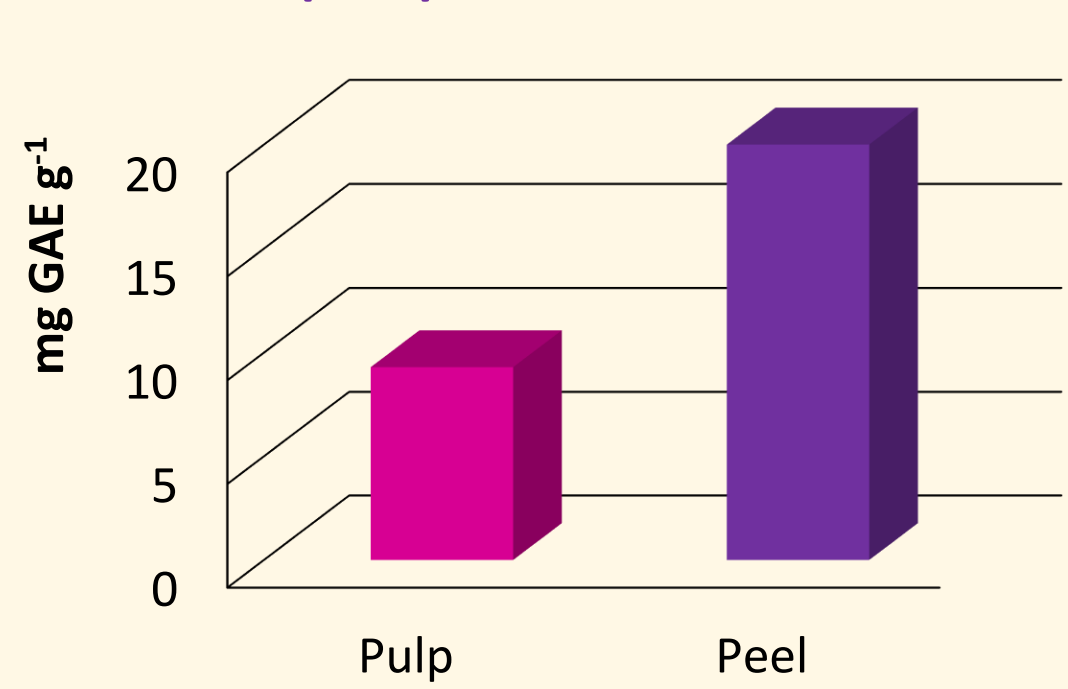

### Antioxidant activity (AA)

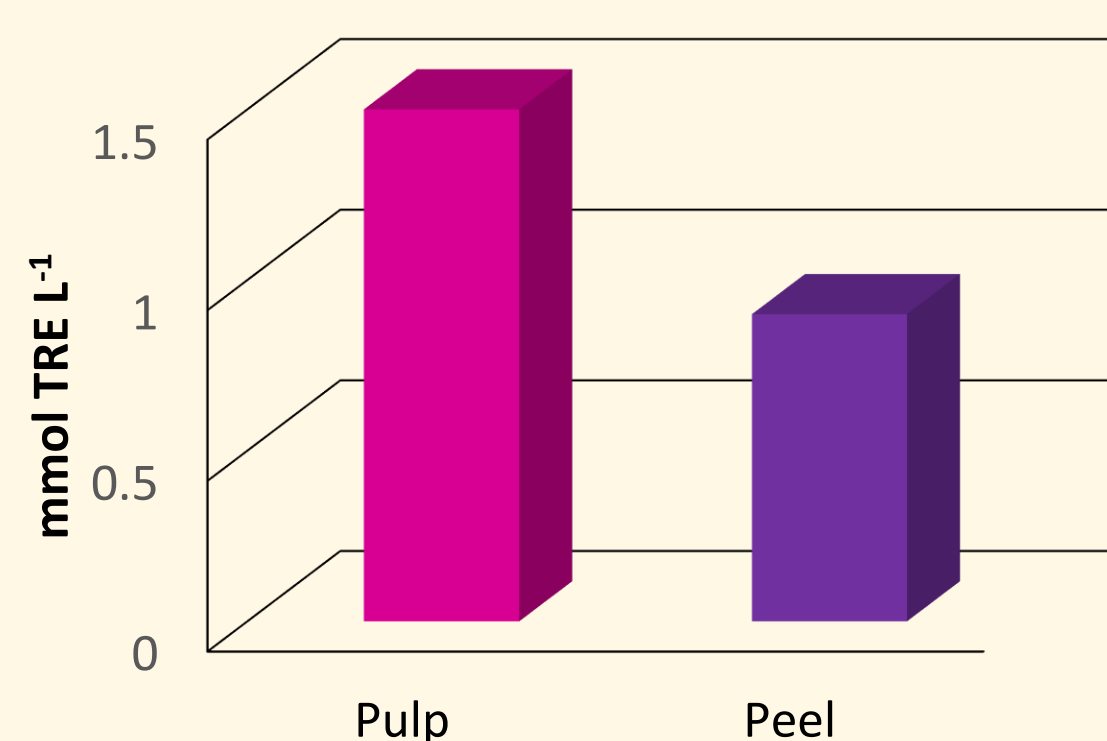

TPC content was clearly higher in the peel extracts, whereas results were similar for AA in both extracts

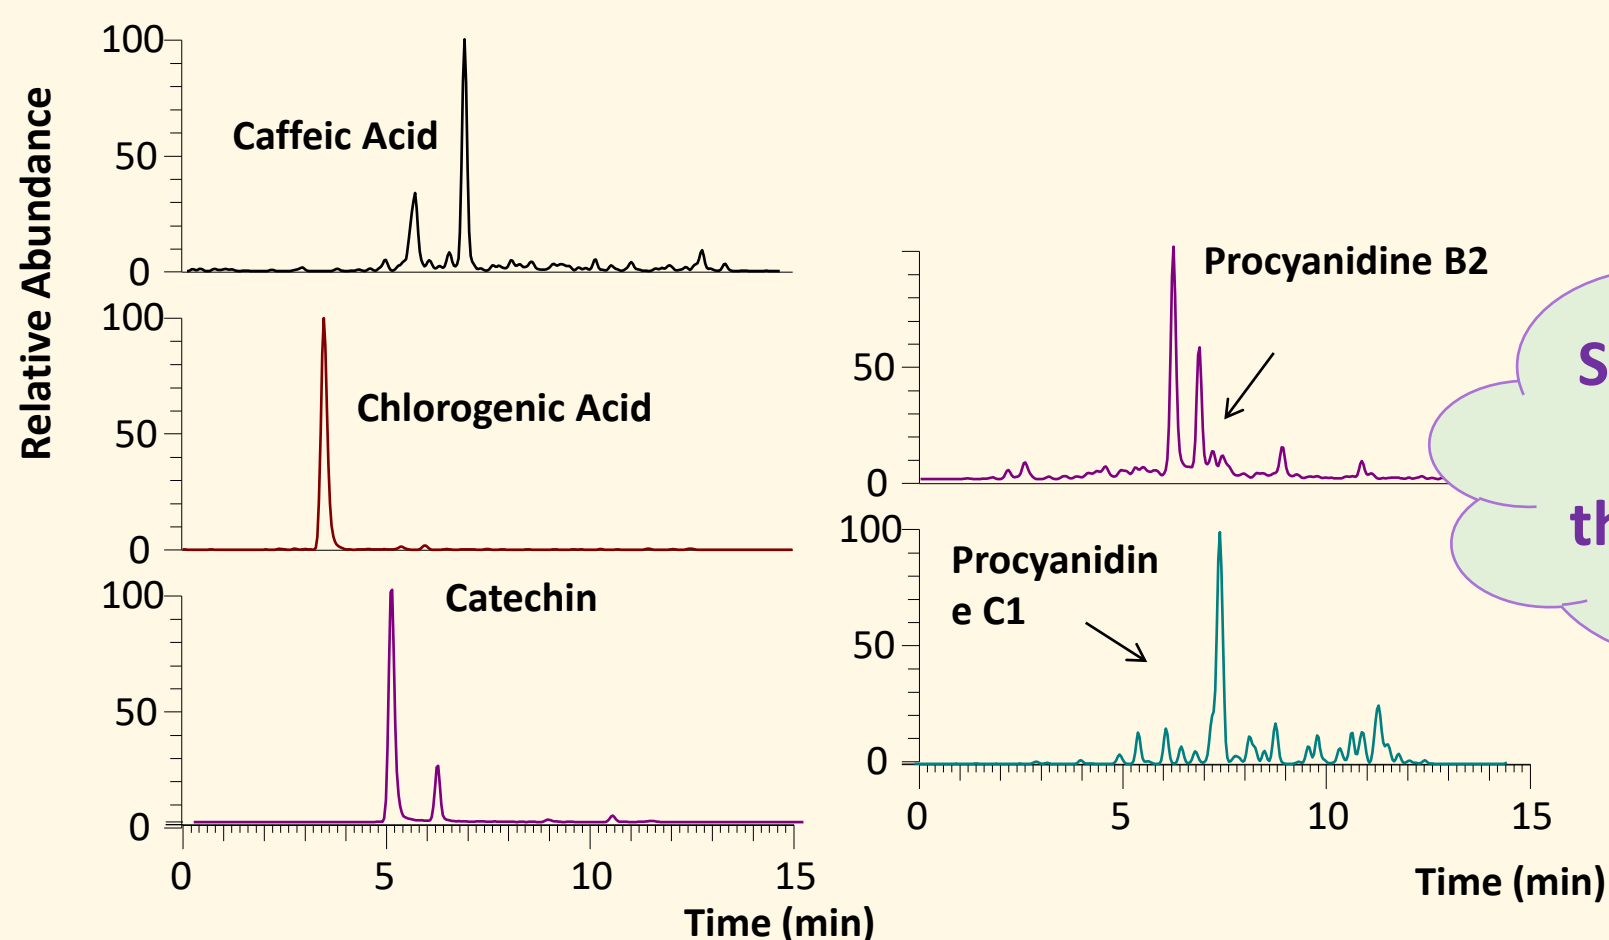

SRM chromatograms for some of the detected compounds

## CHARACTERIZATION OF BIOACTIVE COMPOUNDS

| Polyphenols Group                   | Compound name             | Liquid extract*         | Solid extract*                      |
|-------------------------------------|---------------------------|-------------------------|-------------------------------------|
|                                     |                           | Concentration (µg/g dw) | Concentration (µg/g dw liophilized) |
| Hydroxycinnamic acids               | Caffeic Acid              | 1.4 ± 0.3               | 0.18 ± 0.01                         |
|                                     | Chlorogenic Acid          | 1225 ± 331              | 107 ± 15                            |
|                                     | <b>Σ Non-Flavonoids</b>   | <b>1226</b>             | <b>107</b>                          |
| Flavan-3-ols                        | Catechin                  | 37 ± 10                 | 1.2 ± 0.6                           |
|                                     | Epicatechin               | 4.8 ± 0.2               | 0.6 ± 0.2                           |
|                                     | <b>Σ Flavan-3-ols</b>     | <b>42</b>               | <b>2</b>                            |
| Flavan-3-ols oligomeric derivatives | Procyanidine A1           | 107 ± 14                | 3.6 ± 0.1                           |
|                                     | Procyanidine B2           | 77 ± 29                 | 3 ± 1                               |
|                                     | Procyanidine C1           | 551 ± 251               | 21 ± 10                             |
|                                     | <b>Σ Procyanidines</b>    | <b>735</b>              | <b>60</b>                           |
| Flavonols                           | Quercetin                 | 144 ± 40                | 19 ± 3                              |
|                                     | Isoquercetin              | 517 ± 165               | 44 ± 7                              |
|                                     | Rutin                     | 65 ± 35                 | 5 ± 1                               |
|                                     | Myricetin                 | 23 ± 7                  | 3.3 ± 0.4                           |
| <b>Σ Flavonols</b>                  | <b>749</b>                | <b>71</b>               |                                     |
| Anthocyanidins                      | Delphinidin               | 1327 ± 278              | 25 ± 8                              |
|                                     | Cyanidin                  | 780 ± 74                | 27 ± 5                              |
|                                     | Petunidine                | 1526 ± 411              | 37 ± 9                              |
|                                     | Peonidin                  | 85 ± 29                 | 6 ± 1                               |
|                                     | Malvidin                  | 2353 ± 1125             | 204 ± 84                            |
| Anthocyanins                        | Petunidin-3-O-glucoside   | 318 ± 141               | 24 ± 11                             |
|                                     | Cyanidin-3-glucoside      | 510 ± 193               | 48 ± 20                             |
|                                     | <b>Σ Anthocyani(di)ns</b> | <b>6899</b>             | <b>371</b>                          |
| <b>Σ Flavonoids</b>                 | <b>1526</b>               | <b>133</b>              |                                     |
| <b>Σ BIOACTIVE POLYPHENOLS</b>      | <b>9651</b>               | <b>611</b>              |                                     |

\* Results showed for MSATs extraction

## CONCLUSIONS

- Anthocyanins were the most abundant polyphenolic group of compounds in the blueberry peel extracts reaching concentrations up to 6899 µg g<sup>-1</sup>dw.
- Other compounds with interesting properties such as quercetin and its derivatives (isoquercetin, rutin), caffeic and chlorogenic acids were also found at high concentration levels (1226 µg g<sup>-1</sup>dw) in the obtained blueberry peel extracts.
- The ultimate goal of this work is investigating the utility of food processing wastes as raw materials to obtain extracts with added value to be used in new products with beneficial health properties.

## Acknowledgements

This research was funded by project ED431 2020/06 (Galician Competitive Research Groups Xunta de Galicia). The authors belong to the National Network for the Innovation in miniaturized sample preparation techniques, RED2018-102522-T (Ministry of Science, Innovation and Universities, Spain). This study is based upon work from the Sample Preparation Study Group and Network, supported by the Division of Analytical Chemistry of the European Chemical Society. All these programmes are co-funded by FEDER (EU).
